# Supplementary material for: Image Processing Based Atmospheric River Tracking Method Version 1 (IPART-1)
Source: Copernicus journal article supplement (doi:10.5194/gmd-2020-135), 2020-06-03
Supplement: Supplementary file 1 [file gmd-2020-135-supplement.pdf]

# Supplementary materials

June 3, 2020

## 1 Evolution sequences of some selected AR tracks

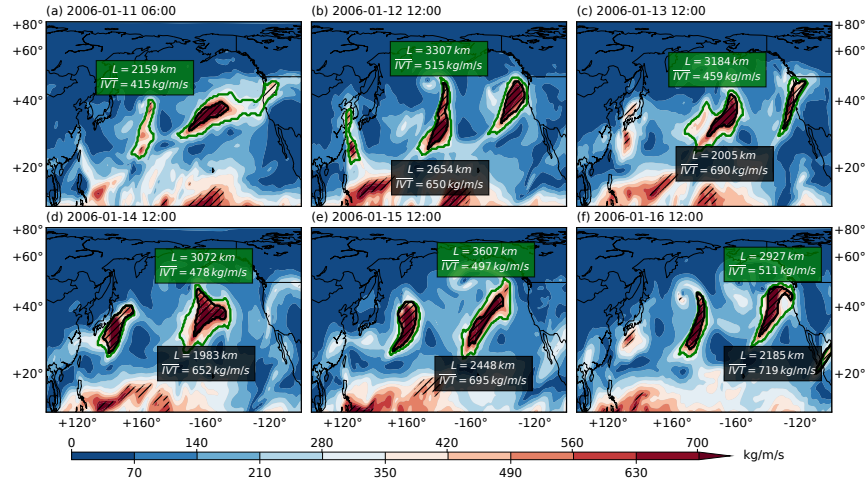

Figure 1: IVT distribution snapshots following an selected AR track from 2006-01-11 06 UTC in (a) to 2006-01-16 12 UTC in (f). ARs found by the THR-t4-s6 method are drawn in green contours, and those by IVT250ano method in black contours. Hatching indicates areas where the IVT anomalies are above the 250 kg/m/s threshold. Length (in km) and averaged IVT (in kg/m/s) of the selected AR are labelled in a green box for the THR method, and a black box for the IVT250ano method.

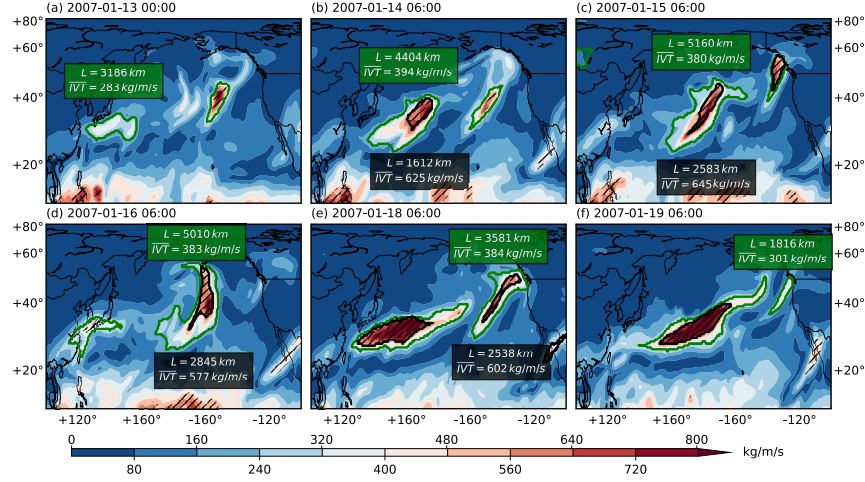

Figure 2: Similar as Fig.1 but for an AR track during 2007-Jan.

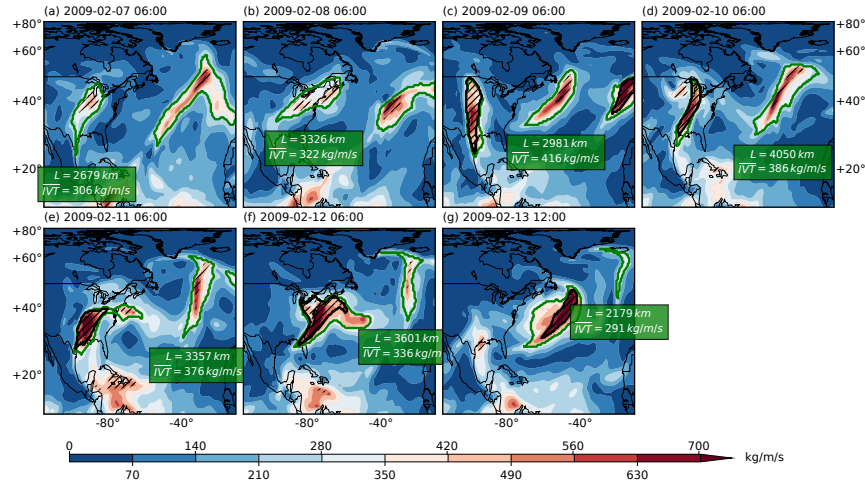

Figure 3: Similar as Fig.1 but for an AR track during 2009-Feb over North Atlantic.
